# Supplementary material for: Insights into the first multi-transition-metal containing Ruddlesden–Popper-type cathode for all-solid-state fluoride ion batteries
Source: Royal Society of Chemistry journal article supplement (doi:10.1039/d4ta00704b), 2024-01-01
Supplement: d4ta00704b1.pdf [file d4ta00704b1.pdf]

Supplementary Information for

# Insights into the First Multi-Transition-Metal Containing Ruddlesden Popper-Type Cathode for all-solid-state Fluoride Ion Batteries

Vanita Vanita <sup>a</sup>, Aamir Iqbal Waidha <sup>a</sup>, Sami Vasala <sup>b</sup>, Pascal Puphal <sup>d</sup>, Roland Schoch <sup>c</sup>, Pieter Glatzel <sup>b</sup>, Matthias Bauer <sup>c</sup>, & Oliver Clemens <sup>a\*</sup>

<sup>a</sup> University of Stuttgart, Institute for Materials Science, Materials Synthesis Group, Heisenbergstraße 3, 70569 Germany

<sup>b</sup> ID26, European Synchrotron Radiation Facility (ESRF), 71 avenue des Martyrs CS 40220, 38043 Grenoble Cedex 9

<sup>c</sup> Institute of Inorganic Chemistry and Center for Sustainable Systems Design (CSSD), Paderborn University, Warburger Straße 100, 33098 Paderborn, Germany.

<sup>d</sup> Max-Planck-Institute, Heisenbergstr. 1, 70569 Stuttgart, Germany

\* Corresponding Author:

Prof. Dr. Oliver Clemens

Email: [oliver.clemens@imw.uni-stuttgart.de](mailto:oliver.clemens@imw.uni-stuttgart.de)

Fax: +49 711 685 51933

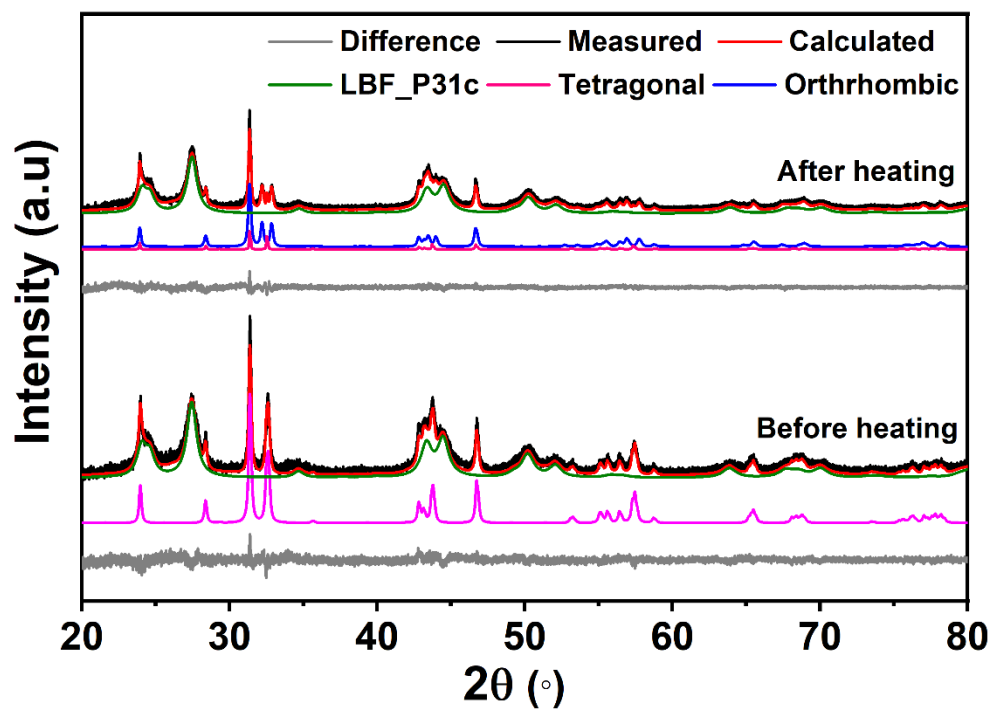

Figure S 1. XRD of cathode material before and after heating at  $T= 170^\circ\text{C}$ .

Table S 1. Details of the structures of the pristine, cathode material and after heating the cathode material at T= 170°C

|                                       |   | <b>La<sub>2</sub>Ni<sub>0.75</sub>Co<sub>0.25</sub>O<sub>4.08</sub></b> | <b>Cathode composite</b>    | <b>Heated cathode composite</b> |
|---------------------------------------|---|-------------------------------------------------------------------------|-----------------------------|---------------------------------|
| <b>Crystal system and space group</b> |   | Tetragonal I4/mmm                                                       | Tetragonal I4/mmm           | Tetragonal I4/mmm               |
| <b>Lattice parameter</b>              | a | 3.88125(4)                                                              | 3.88081(19)                 | 3.88088(19)                     |
|                                       | c | 12.57064(18)                                                            | 12.5688(9)                  | 12.5690(9)                      |
| <b>Cell volume</b>                    |   | 189.365(4) (Å <sup>3</sup> )                                            | 189.30(2) (Å <sup>3</sup> ) | 189.30(2)                       |

Table S 2.  $\text{La}_2\text{Ni}_{0.75}\text{Co}_{0.25}\text{O}_{4.08}$  Weight and Atomic % from the EDAX analysis

| <b>Element</b> | <b>Weight %</b> | <b>Atomic %</b> |
|----------------|-----------------|-----------------|
| <b>La L</b>    | 73.10           | 33.80           |
| <b>Ni K</b>    | 11.10           | 12.10           |
| <b>Co K</b>    | 04.40           | 04.80           |
| <b>O K</b>     | 08.90           | 35.70           |

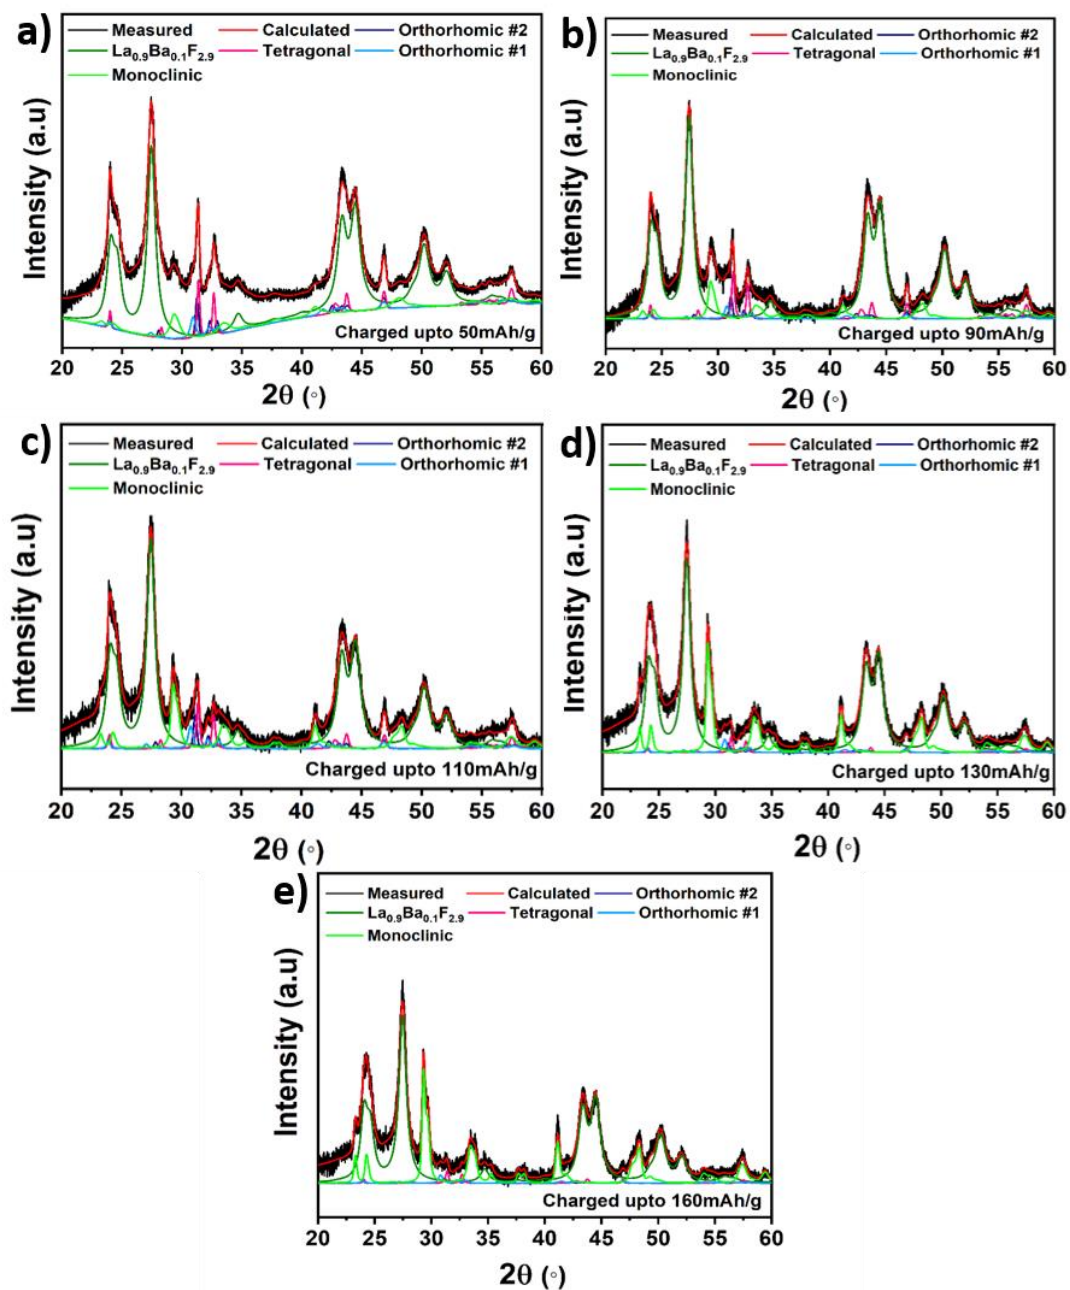

Figure S 2. **Structural changes of the RP-type phase at different cut off capacities.** Retiveld refinement for  $\text{La}_2\text{Ni}_{0.75}\text{Co}_{0.25}\text{O}_{4.08} / \text{Pb-PbF}_2$  at  $T=170$  dc,  $I_{\text{charge}}=+8.0294\mu\text{A}$ ,  $I_{\text{discharge}}=-4.0145\mu\text{A}$ , at the charging capacity of (a)  $50 \text{ mAh g}^{-1}$  (b)  $90 \text{ mAh g}^{-1}$  (c)  $110 \text{ mAh g}^{-1}$  (d)  $130 \text{ mAh g}^{-1}$  (e)  $160 \text{ mAh g}^{-1}$

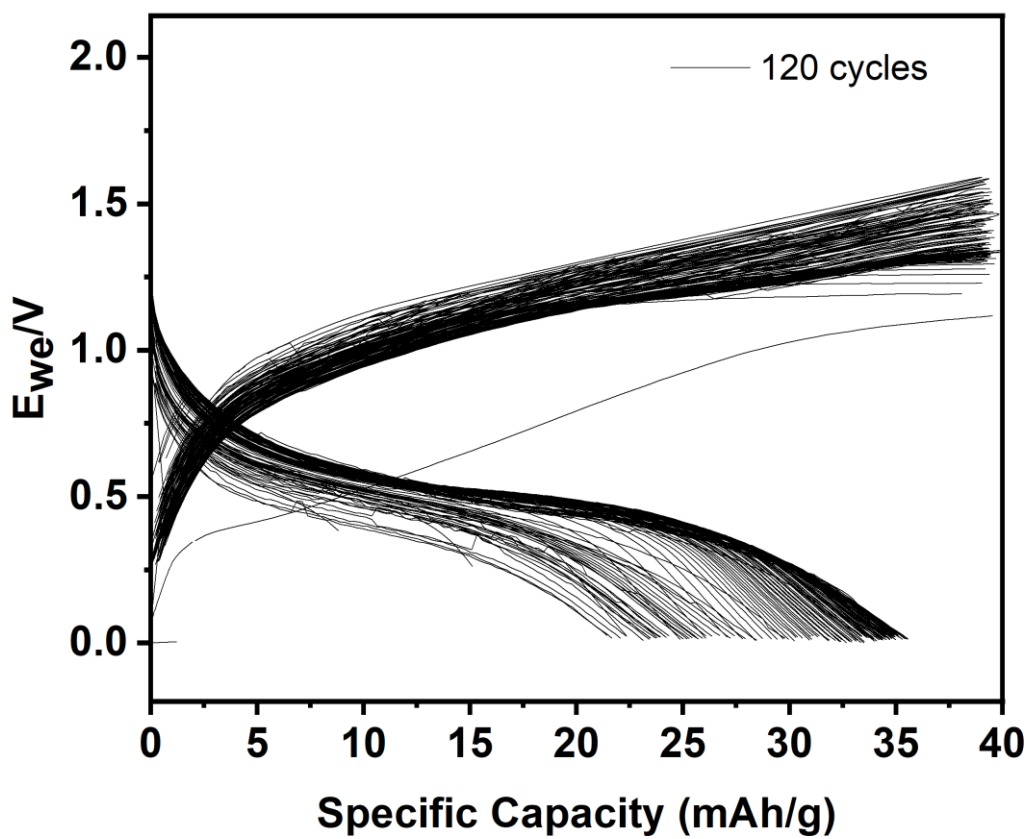

Figure S 3. Capacity-voltage curves for the cell operated for 120 cycles between 0 and 1.5 V

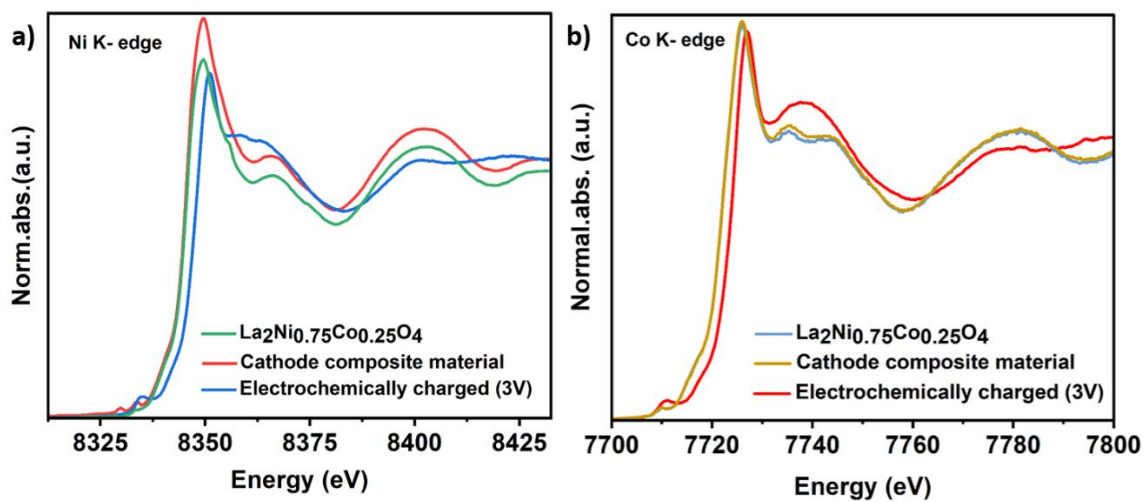

Figure S 4. The absorption edge energies of  $\text{La}_2\text{Ni}_{0.75}\text{Co}_{0.25}\text{O}_{4.08}$  compared to cathode composite of  $\text{La}_2\text{Ni}_{0.75}\text{Co}_{0.25}\text{O}_{4.08}$  and electrochemically charged upto 3V at Ni, Co K-edge.

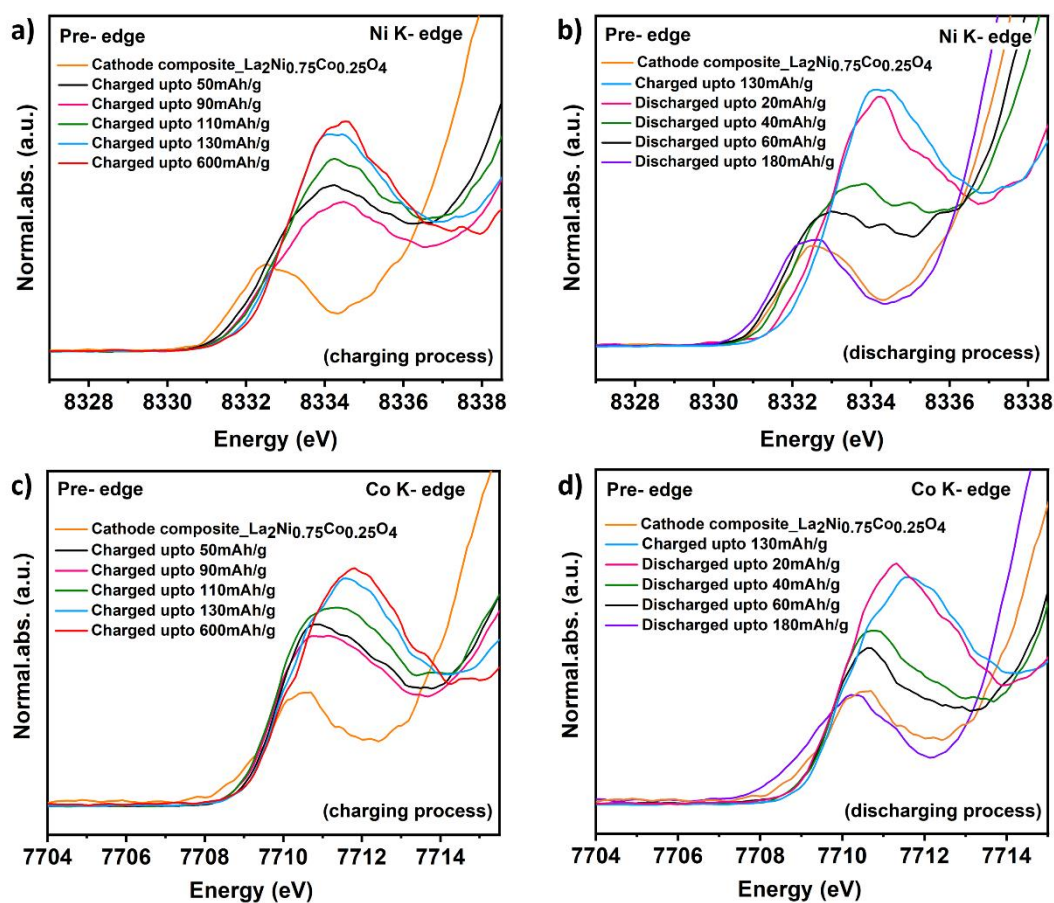

Figure S 5. Pre- edge of HERFD- XAS at Ni K-edge (a) La<sub>2</sub>Ni<sub>0.75</sub>Co<sub>0.25</sub>O<sub>4.08</sub> after F insertion (b) La<sub>2</sub>Ni<sub>0.75</sub>Co<sub>0.25</sub>O<sub>4.08</sub> after F extraction Pre- edge at Co K-edge (c) La<sub>2</sub>Ni<sub>0.75</sub>Co<sub>0.25</sub>O<sub>4.08</sub> after F insertion (d) La<sub>2</sub>Ni<sub>0.75</sub>Co<sub>0.25</sub>O<sub>4.08</sub> after F extraction.



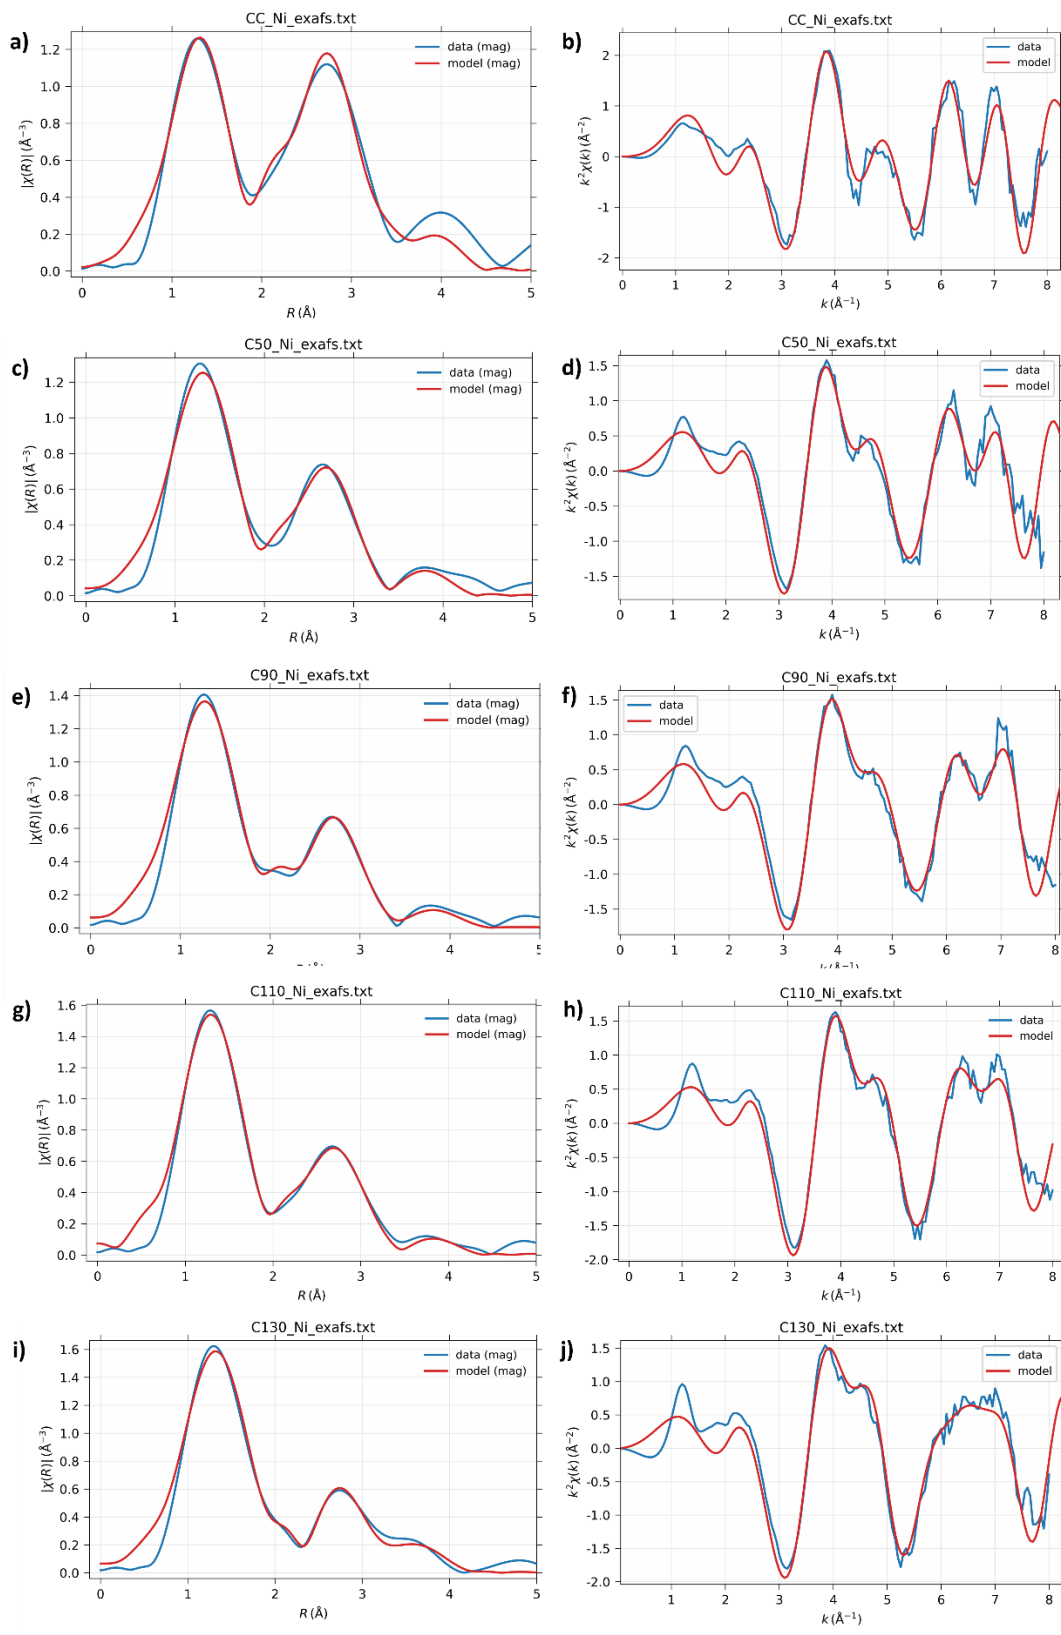

Figure S 6. EXAFS fits in  $R$  and  $k$  space at Ni  $K$ -edge of  $\text{La}_2\text{Ni}_{0.75}\text{Co}_{0.25}\text{O}_{4.08}$  after  $F$  insertion.

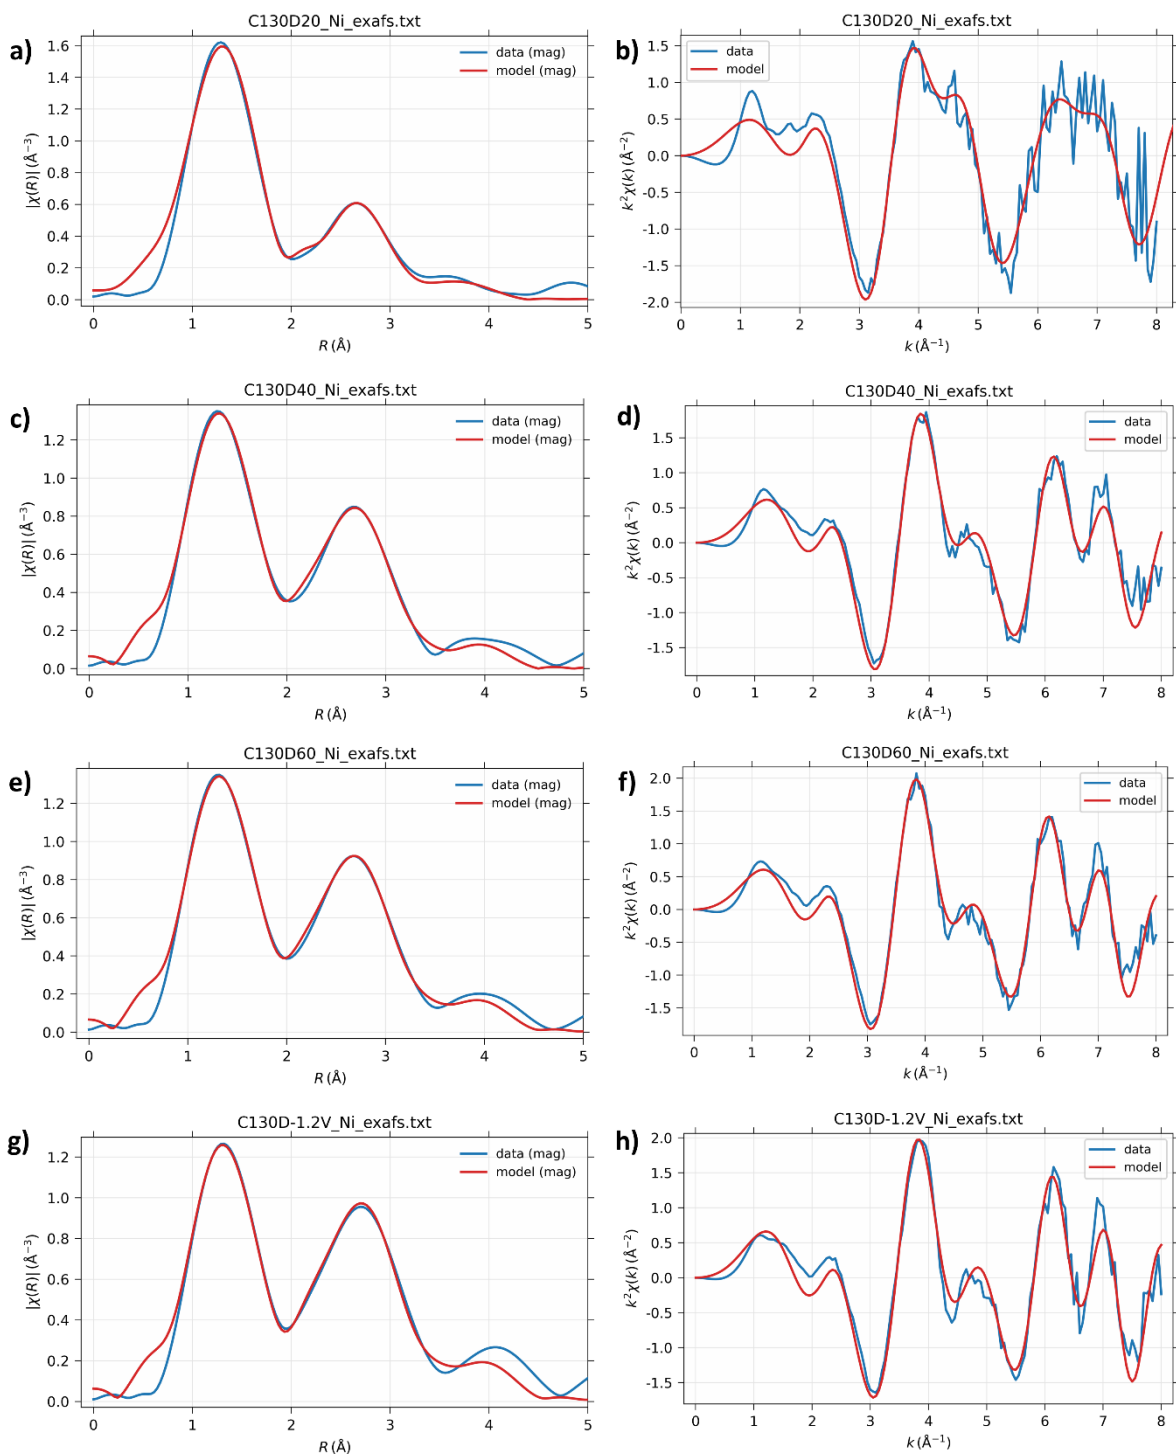

Figure S 7. EXAFS fits in R and k space at Ni K-edge of  $\text{La}_2\text{Ni}_{0.75}\text{Co}_{0.25}\text{O}_{4.08}$  after  $\text{F}^-$  extraction.

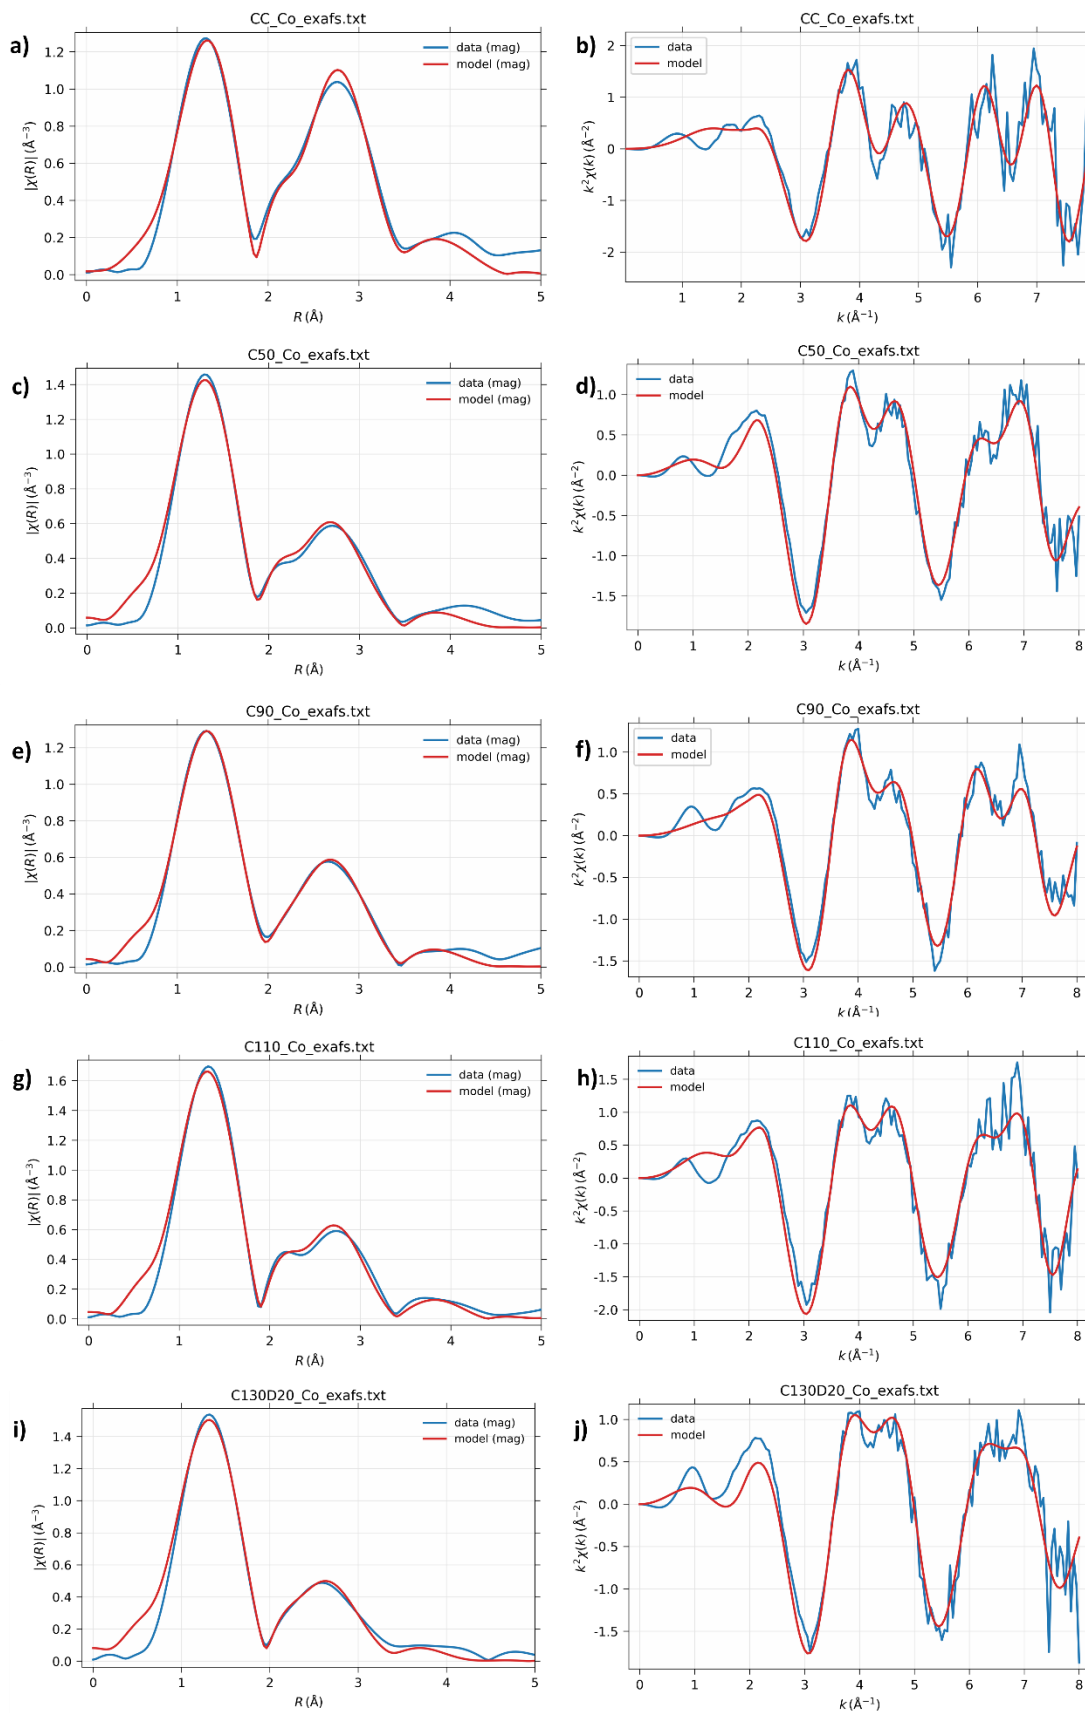

Figure S 8. EXAFS fits in  $R$  and  $k$  space at Co  $K$ -edge of  $\text{La}_2\text{Ni}_{0.75}\text{Co}_{0.25}\text{O}_{4.08}$  after  $F$  insertion.

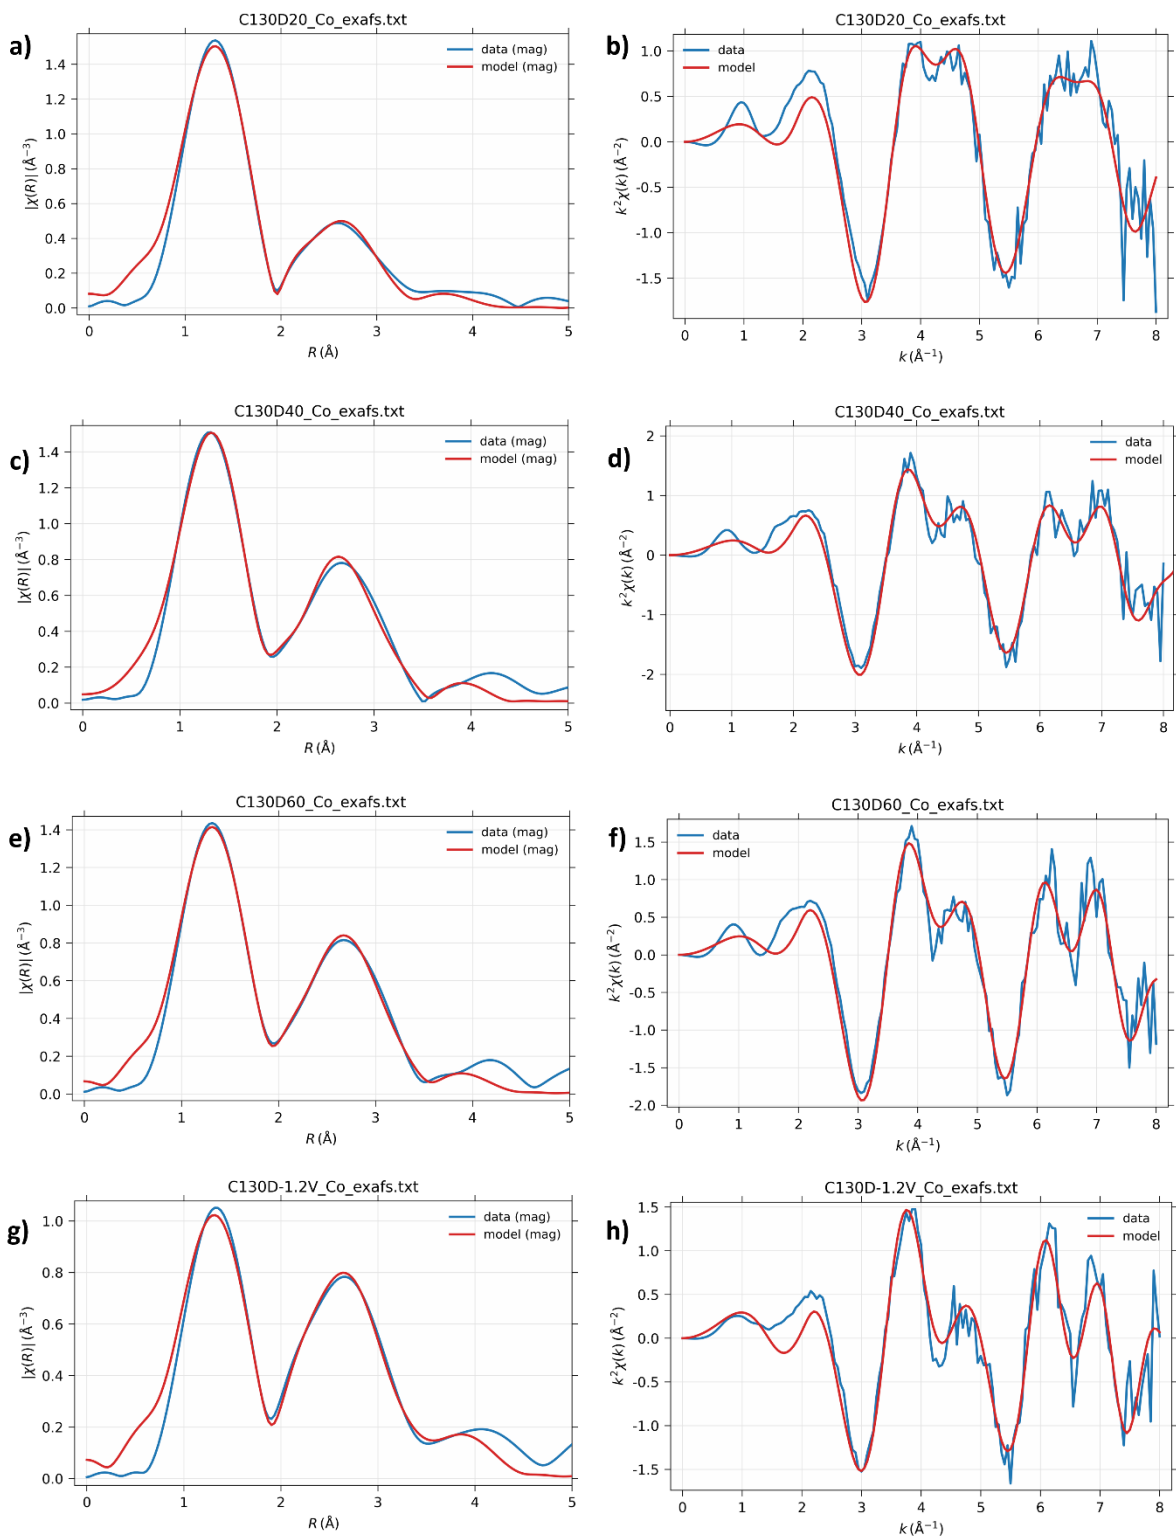

Figure S 9. EXAFS fits in  $R$  and  $k$  space at Co K-edge of  $\text{La}_2\text{Ni}_{0.75}\text{Co}_{0.25}\text{O}_{4.08}$  after  $F$  extraction.

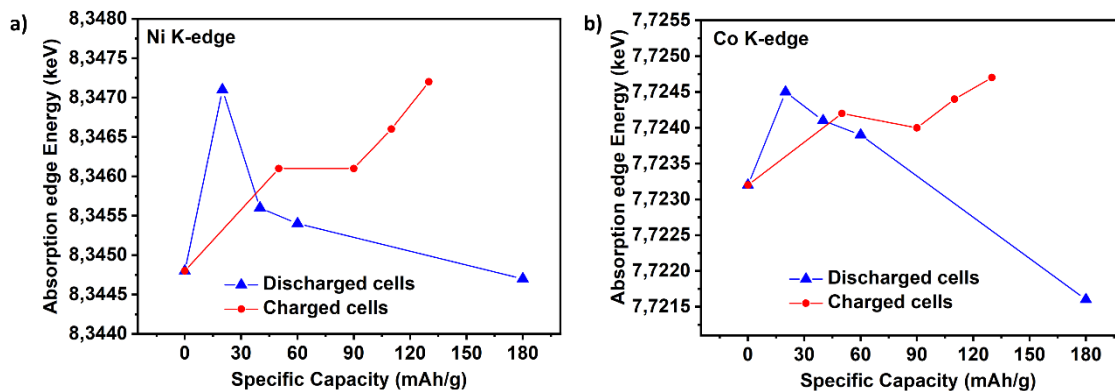

Figure S 10. Adsorption energies shift of  $\text{La}_2\text{Ni}_{0.75}\text{Co}_{0.25}\text{O}_{4.08}$  during  $F$  insertion and extraction.

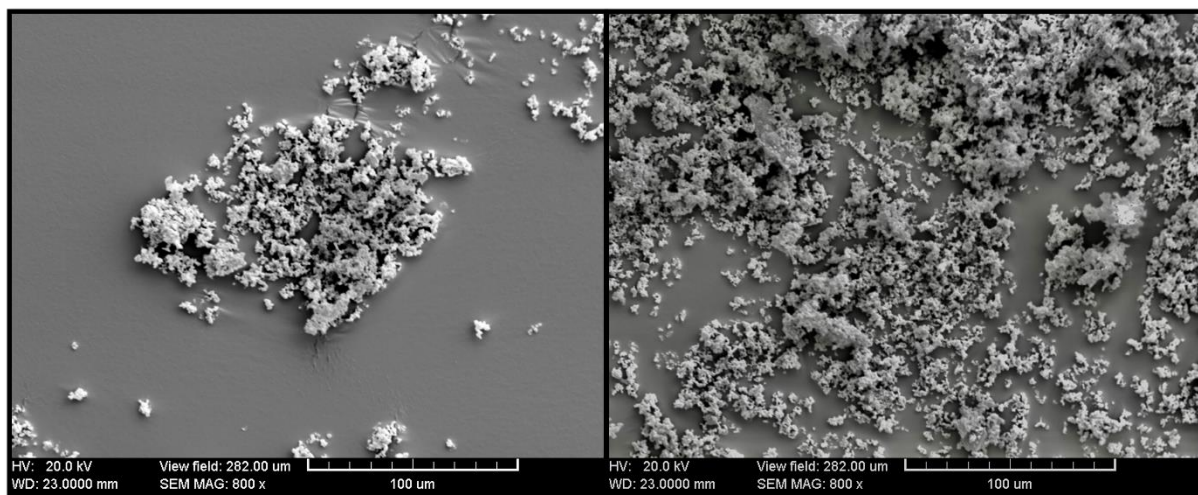

Figure S 11. SEM micrograph of  $\text{La}_2\text{Ni}_{0.75}\text{Co}_{0.25}\text{O}_{4.08}$  before sintering at low magnification (800 x).

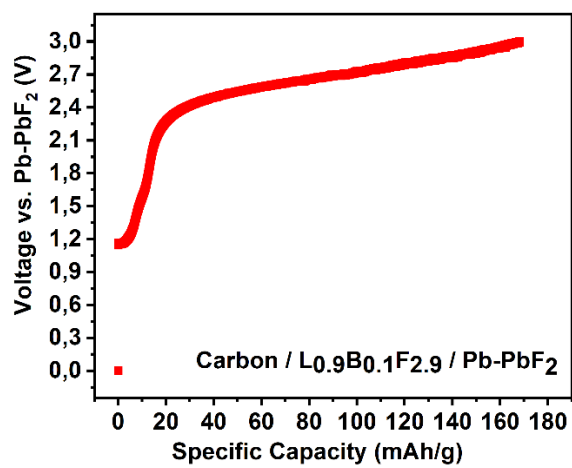

Figure S 12. Capacity-voltage curve for the cell operated only with carbon.
